# Supplementary material for: Improving quality of surgical and anaesthesia care at hospital level in sub-Saharan Africa: a systematic review protocol of health system strengthening interventions
Source: BMJ Open. 2020 May 30;10(5):e036615. doi: 10.1136/bmjopen-2019-036615 (PMC7264698; doi:10.1136/bmjopen-2019-036615)
Supplement: Supplementary data [file bmjopen-2019-036615supp001.pdf]

Supplementary File 1

Improving quality of surgical and anaesthesia care at hospital level in SSACs: a systematic review protocol of health system strengthening interventions.

PRISMA-P (Preferred Reporting Items for Systematic review and Meta-Analysis Protocols) 2015 checklist: recommended items to address in a systematic review protocol\*

| Section and topic          | Item No | Checklist item                                                                                                                                                                                  | Section where each item is addressed in the protocol |
|----------------------------|---------|-------------------------------------------------------------------------------------------------------------------------------------------------------------------------------------------------|------------------------------------------------------|
| ADMINISTRATIVE INFORMATION |         |                                                                                                                                                                                                 |                                                      |
| Title:                     |         |                                                                                                                                                                                                 |                                                      |
| Identification             | 1a      | Identify the report as a protocol of a systematic review                                                                                                                                        | Title page                                           |
| Update                     | 1b      | If the protocol is for an update of a previous systematic review, identify as such                                                                                                              | N/A                                                  |
| Registration               | 2       | If registered, provide the name of the registry (such as PROSPERO) and registration number                                                                                                      | Title page                                           |
| Authors:                   |         |                                                                                                                                                                                                 |                                                      |
| Contact                    | 3a      | Provide name, institutional affiliation, e-mail address of all protocol authors; provide physical mailing address of corresponding author                                                       | Title page                                           |
| Contributions              | 3b      | Describe contributions of protocol authors and identify the guarantor of the review                                                                                                             | Contributions                                        |
| Amendments                 | 4       | If the protocol represents an amendment of a previously completed or published protocol, identify as such and list changes; otherwise, state plan for documenting important protocol amendments | Methods and Analysis                                 |
| Support:                   |         |                                                                                                                                                                                                 |                                                      |
| Sources                    | 5a      | Indicate sources of financial or other support for the review                                                                                                                                   | Funding                                              |
| Sponsor                    | 5b      | Provide name for the review funder and/or sponsor                                                                                                                                               | Funding                                              |
| Role of sponsor or funder  | 5c      | Describe roles of funder(s), sponsor(s), and/or institution(s), if any, in developing the protocol                                                                                              | Funding                                              |
| INTRODUCTION               |         |                                                                                                                                                                                                 |                                                      |
| Rationale                  | 6       | Describe the rationale for the review in the context of what is already known                                                                                                                   | Introduction                                         |
| Objectives                 | 7       | Provide an explicit statement of the question(s) the review will address with reference to participants, interventions, comparators, and outcomes (PICO)                                        | Aim and Objectives                                   |
| METHODS                    |         |                                                                                                                                                                                                 |                                                      |
| Eligibility criteria       | 8       | Specify the study characteristics (such as PICO, study design, setting, time frame) and report characteristics (such                                                                            | Search strategy, Eligibility                         |

|                                    |     |                                                                                                                                                                                                                                                  |                                       |
|------------------------------------|-----|--------------------------------------------------------------------------------------------------------------------------------------------------------------------------------------------------------------------------------------------------|---------------------------------------|
|                                    |     | as years considered, language, publication status) to be used as criteria for eligibility for the review                                                                                                                                         | criteria, Table 1, Appendix 3         |
| Information sources                | 9   | Describe all intended information sources (such as electronic databases, contact with study authors, trial registers or other grey literature sources) with planned dates of coverage                                                            | Search strategy, Figure 1, Appendix 2 |
| Search strategy                    | 10  | Present draft of search strategy to be used for at least one electronic database, including planned limits, such that it could be repeated                                                                                                       | Appendix 1                            |
| Study records:                     |     |                                                                                                                                                                                                                                                  |                                       |
| Data management                    | 11a | Describe the mechanism(s) that will be used to manage records and data throughout the review                                                                                                                                                     | Data extraction                       |
| Selection process                  | 11b | State the process that will be used for selecting studies (such as two independent reviewers) through each phase of the review (that is, screening, eligibility and inclusion in meta-analysis)                                                  | Data extraction                       |
| Data collection process            | 11c | Describe planned method of extracting data from reports (such as piloting forms, done independently, in duplicate), any processes for obtaining and confirming data from investigators                                                           | Data extraction                       |
| Data items                         | 12  | List and define all variables for which data will be sought (such as PICO items, funding sources), any pre-planned data assumptions and simplifications                                                                                          | Appendix 4 and Data Synthesis         |
| Outcomes and prioritization        | 13  | List and define all outcomes for which data will be sought, including prioritization of main and additional outcomes, with rationale                                                                                                             | Outcomes                              |
| Risk of bias in individual studies | 14  | Describe anticipated methods for assessing risk of bias of individual studies, including whether this will be done at the outcome or study level, or both; state how this information will be used in data synthesis                             | Risk of bias                          |
| Data synthesis                     | 15a | Describe criteria under which study data will be quantitatively synthesised                                                                                                                                                                      | Data Synthesis                        |
|                                    | 15b | If data are appropriate for quantitative synthesis, describe planned summary measures, methods of handling data and methods of combining data from studies, including any planned exploration of consistency (such as $I^2$ , Kendall's $\tau$ ) | Appendix 5                            |
|                                    | 15c | Describe any proposed additional analyses (such as sensitivity or subgroup analyses, meta-regression)                                                                                                                                            | Data Synthesis                        |
|                                    | 15d | If quantitative synthesis is not appropriate, describe the type of summary planned                                                                                                                                                               | Data Synthesis                        |
| Meta-bias(es)                      | 16  | Specify any planned assessment of meta-bias(es) (such as publication bias across studies, selective reporting within studies)                                                                                                                    | Data Synthesis                        |
| Confidence in cumulative evidence  | 17  | Describe how the strength of the body of evidence will be assessed (such as GRADE)                                                                                                                                                               | Data Synthesis                        |

**\* It is strongly recommended that this checklist be read in conjunction with the PRISMA-P Explanation and Elaboration (cite when available) for important clarification on the items. Amendments to a review protocol should be tracked and dated. The copyright for PRISMA-P (including checklist) is held by the PRISMA-P Group and is distributed under a Creative Commons Attribution Licence 4.0.**

*From: Shamseer L, Moher D, Clarke M, Ghersi D, Liberati A, Petticrew M, Shekelle P, Stewart L, PRISMA-P Group. Preferred reporting items for systematic review and meta-analysis protocols (PRISMA-P) 2015: elaboration and explanation. BMJ. 2015 Jan 2;349(jan02 1):g7647.*
